# Supplementary material for: Synthesis of the first 4-oxobutane-1,1,2,2-tetracarbonitriles containing a phenol fragment and their transformation into cyano-substituted pyrrol-2-ones showing three-position molecular switching
Source: Royal Society of Chemistry journal article supplement (doi:10.1039/d4ob00612g), 2024-01-01
Supplement: d4ob00612g1.pdf [file d4ob00612g1.pdf]

## SUPPORTING INFORMATION

### **Synthesis of the First 4-Oxobutane-1,1,2,2-Tetracarbonitriles Containing a Phenol**

### **Fragment and Their Transformation into Cyano-Substituted Pyrrol-2-Ones**

### **Showing Three-Position Molecular Switching**

Mikhail Yu. Belikov,\* Angelina G. Milovidova,

Mikhail Yu. Ievlev, Sergey V. Fedoseev

<sup>a</sup> *Ulyanov Chuvash State University, Moskovsky pr. 15, Cheboksary 428015, Russia*

\*E-mail: [belikovmil@mail.ru](mailto:belikovmil@mail.ru)

# $^1\text{H}$ , $^{13}\text{C}$ NMR spectra

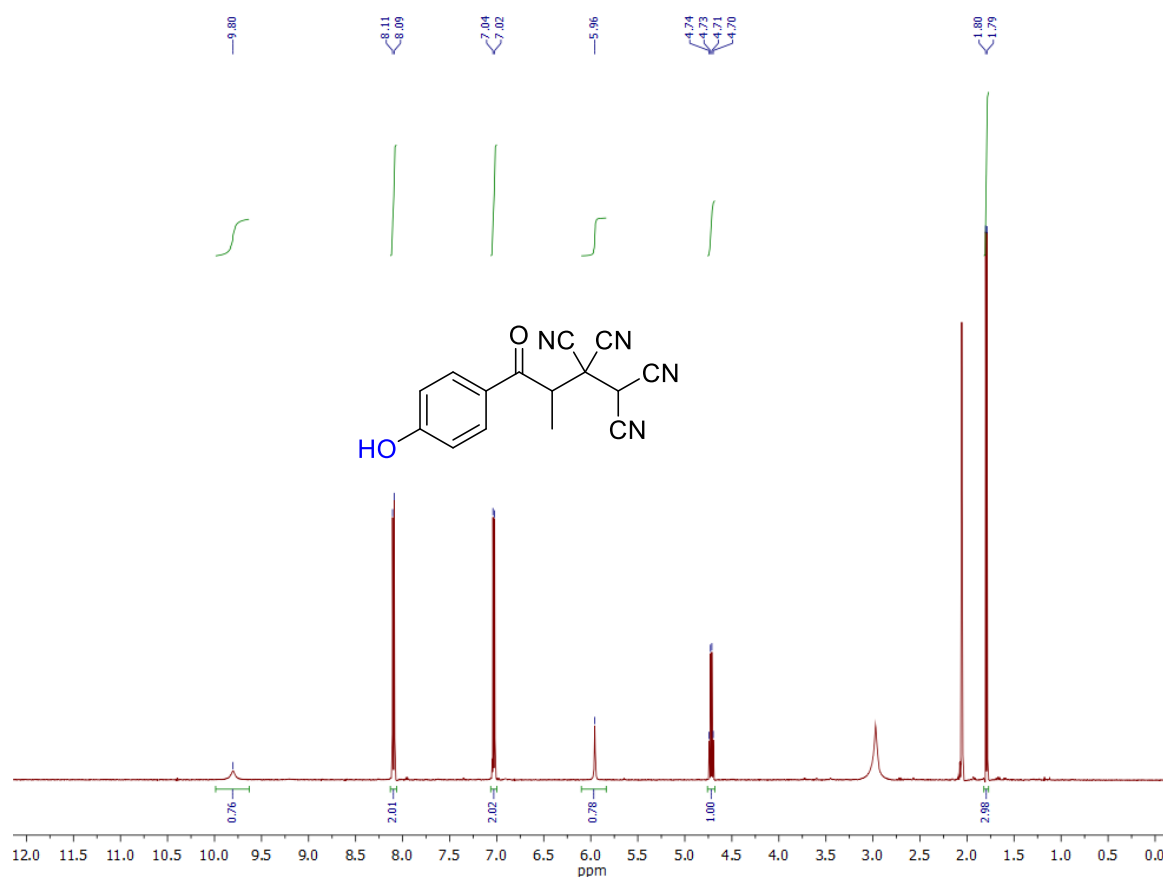

Fig. S1.  $^1\text{H}$ -NMR-spectrum of compound **1a** (500 MHz, acetone- $d_6$ )

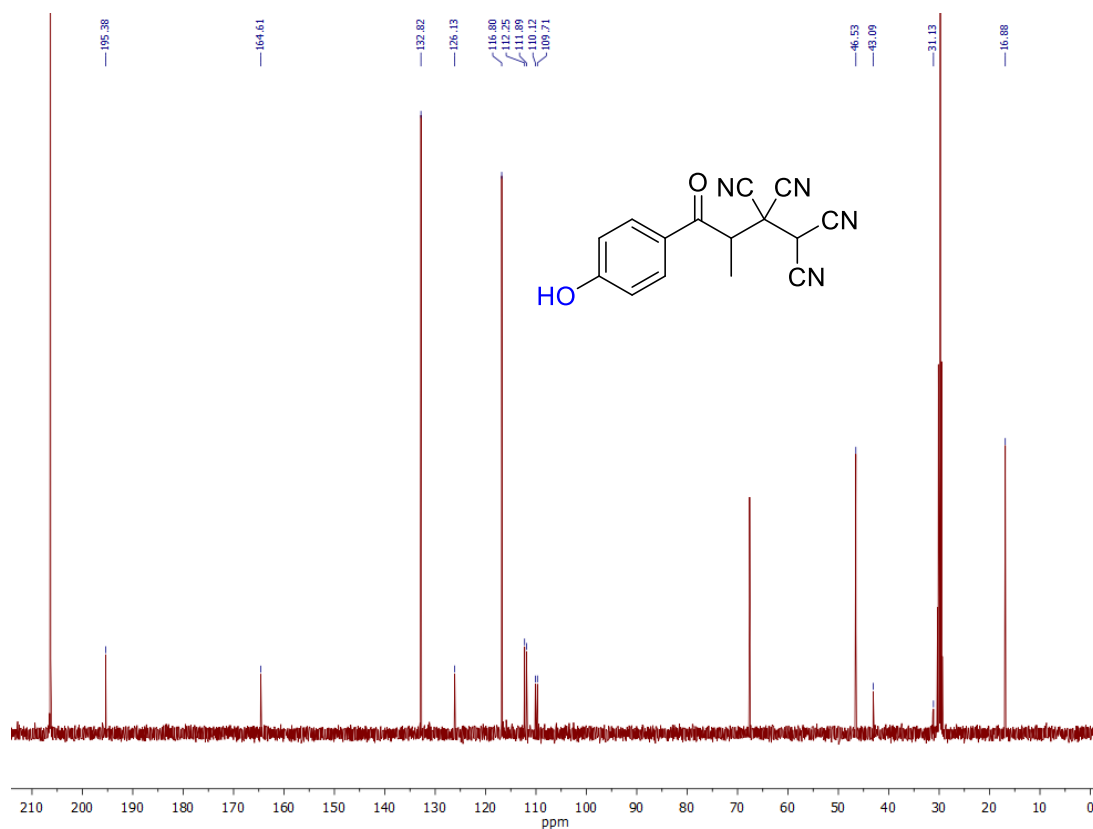

Fig. S2.  $^{13}\text{C}$ -NMR-spectrum of compound **1a** (126 MHz, acetone- $d_6$ )

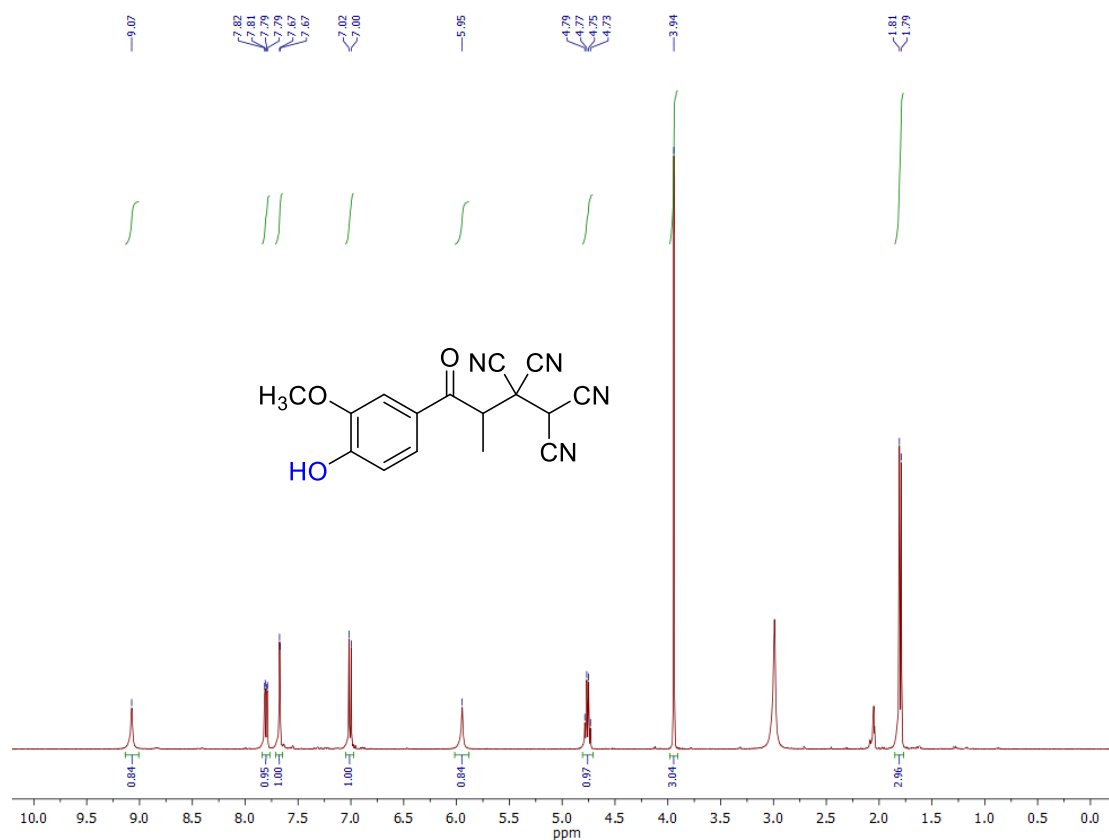

Fig. S3.  $^1\text{H}$ -NMR-spectrum of compound **1b** (400 MHz, acetone- $d_6$ )

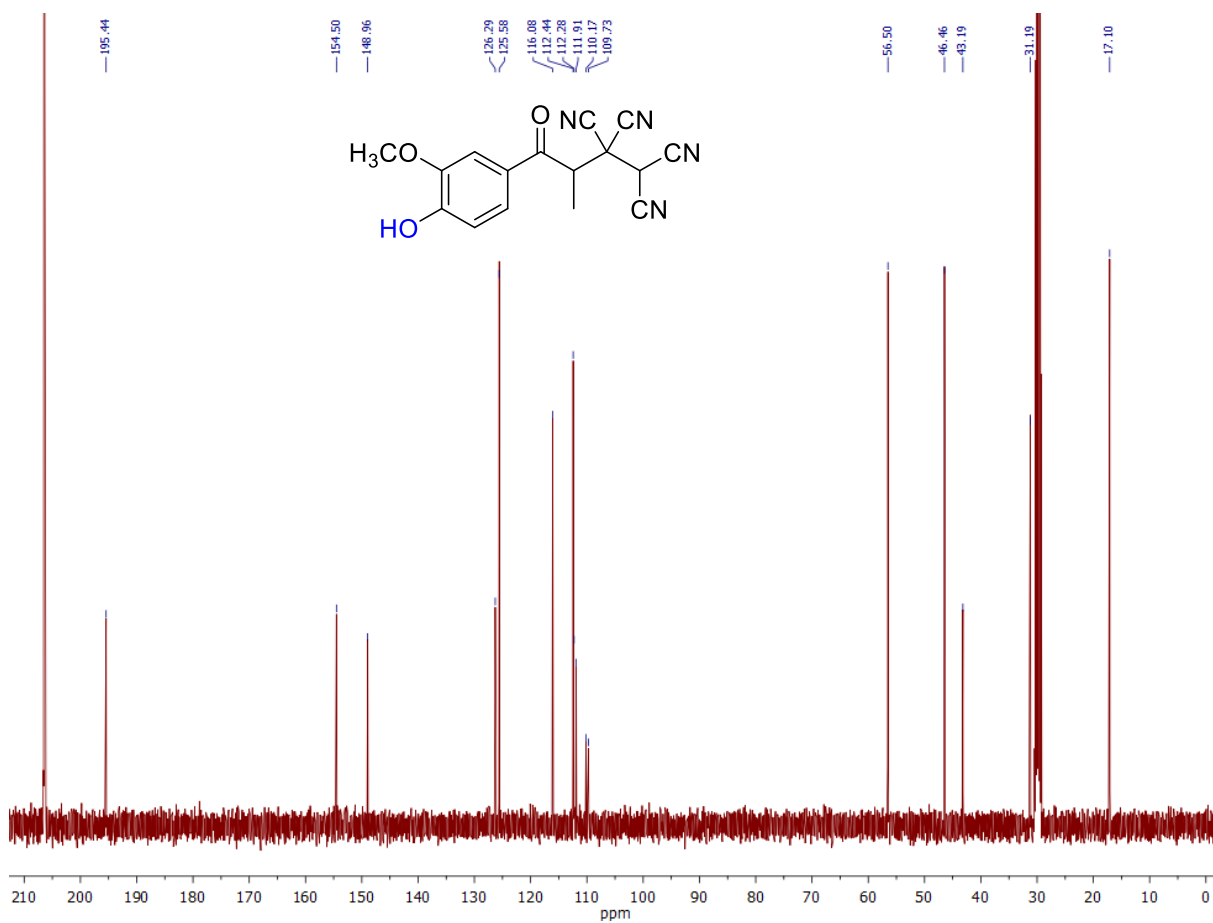

Fig. S4.  $^{13}\text{C}$ -NMR-spectrum of compound **1b** (101 MHz, acetone- $d_6$ )

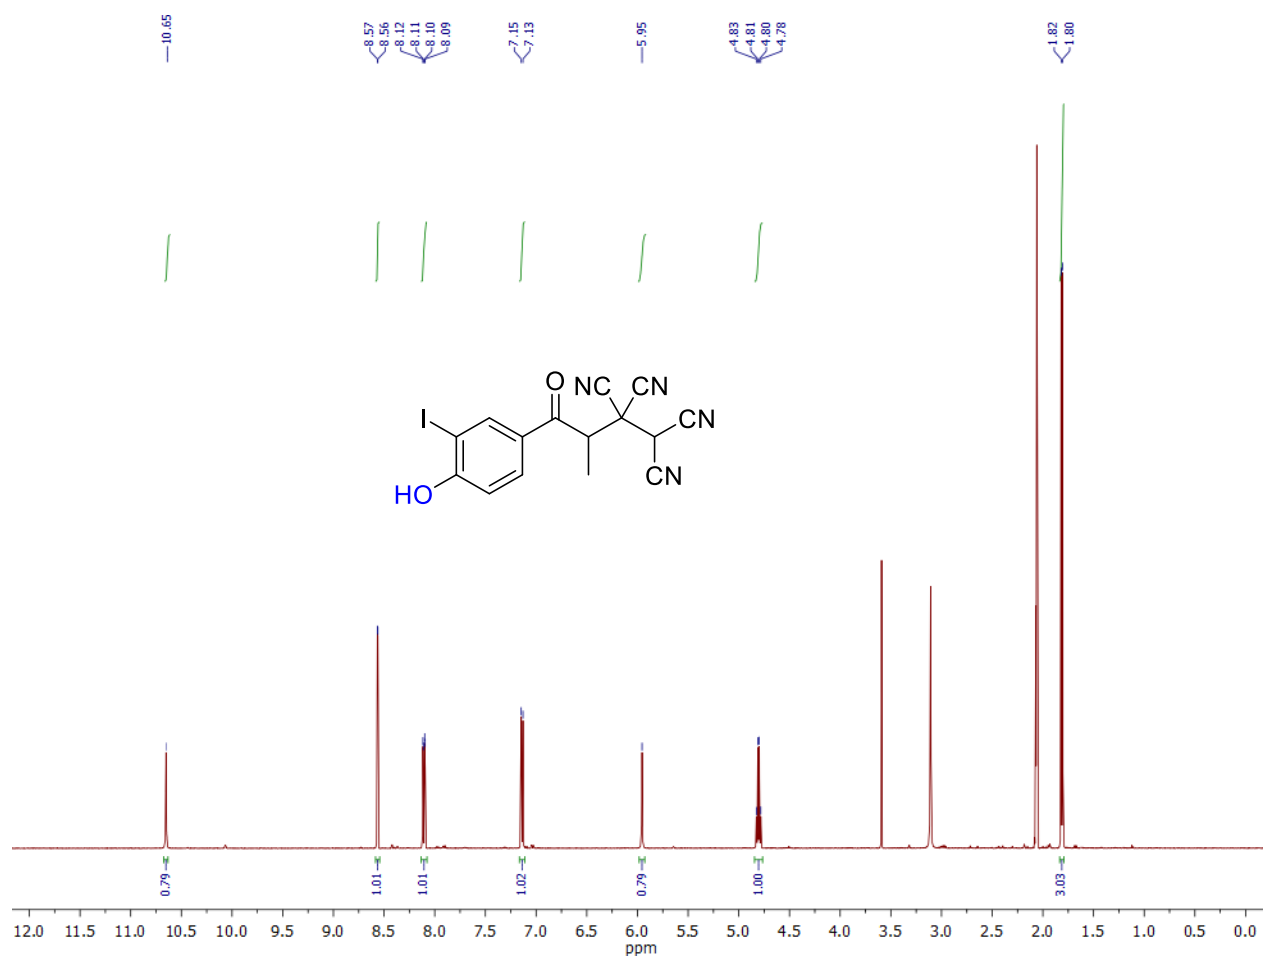

Fig. S5. <sup>1</sup>H-NMR-spectrum of compound **1c** (500 MHz, acetone-*d*<sub>6</sub>)

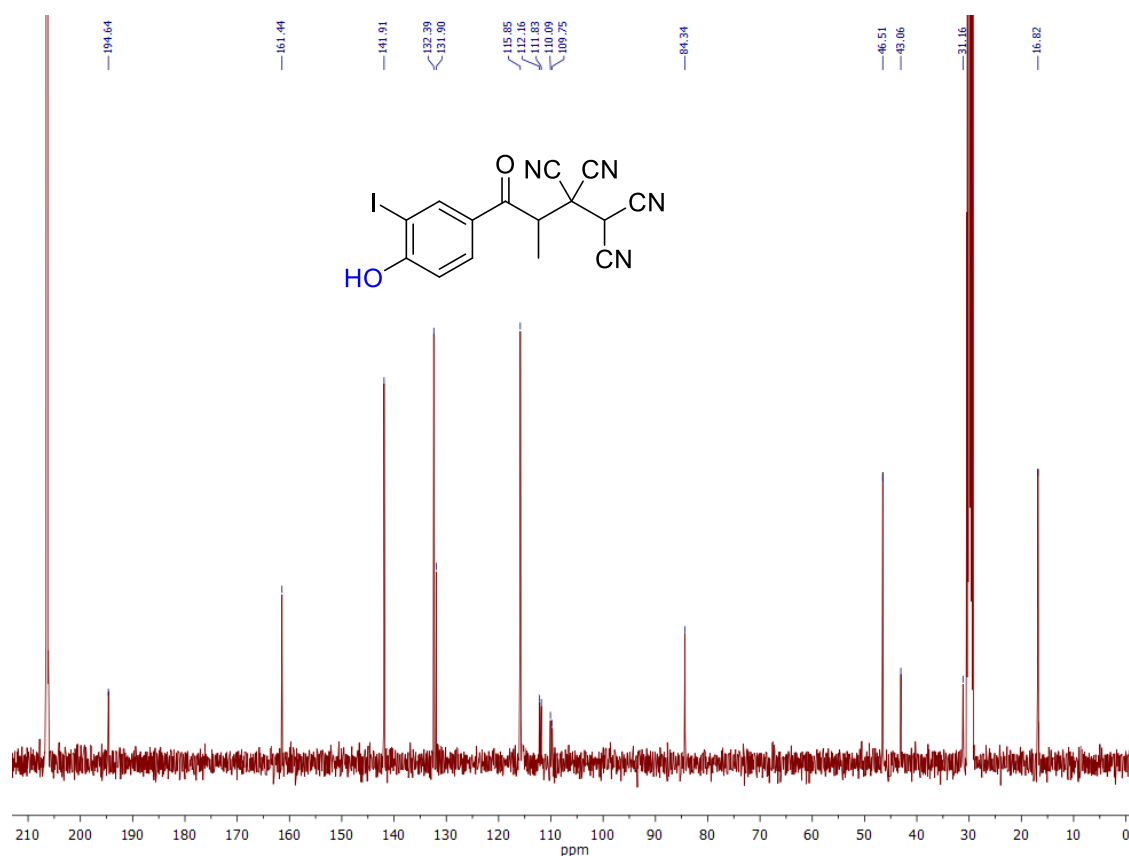

Fig. S6. <sup>13</sup>C-NMR-spectrum of compound **1c** (101 MHz, acetone-*d*<sub>6</sub>)

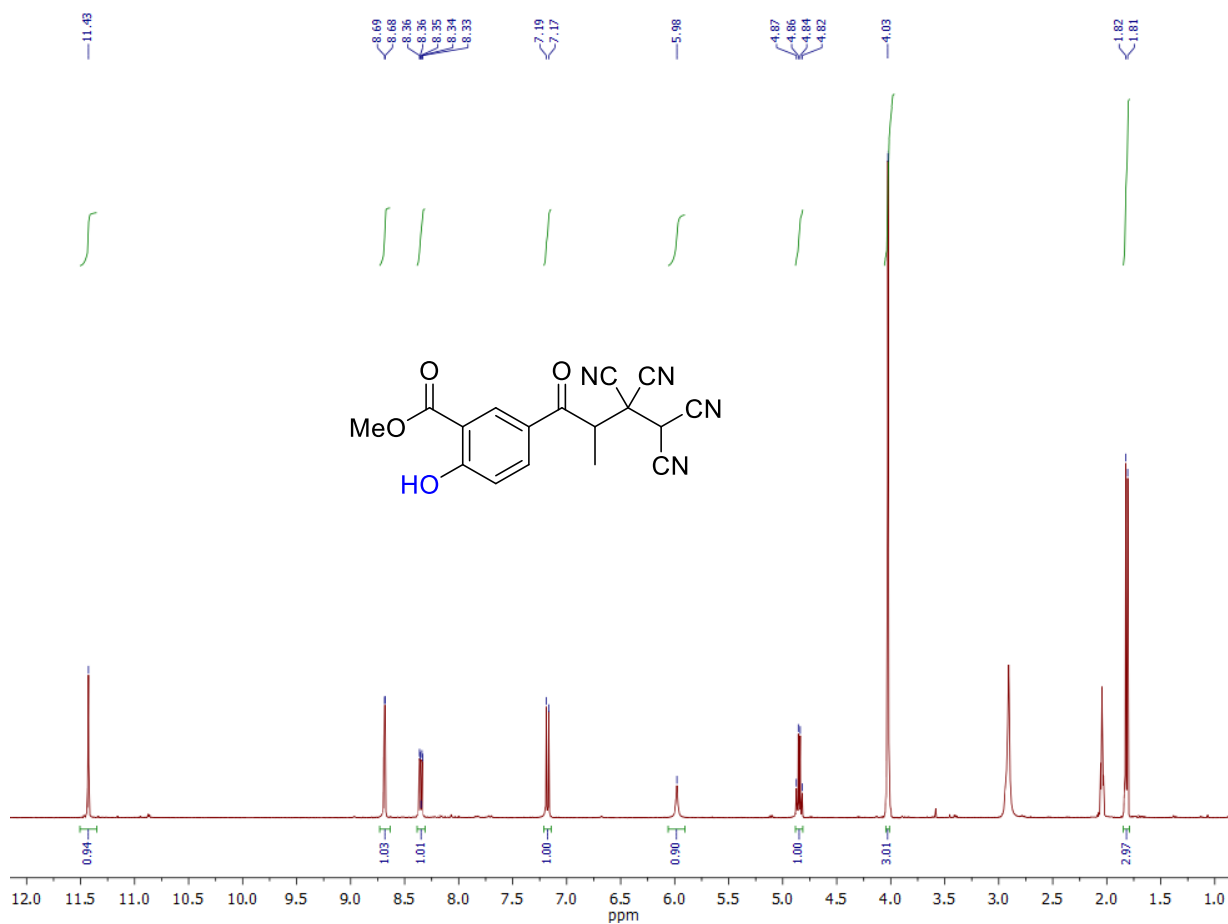

Fig. S7. <sup>1</sup>H-NMR-spectrum of compound **1d** (400 MHz, acetone-*d*<sub>6</sub>)

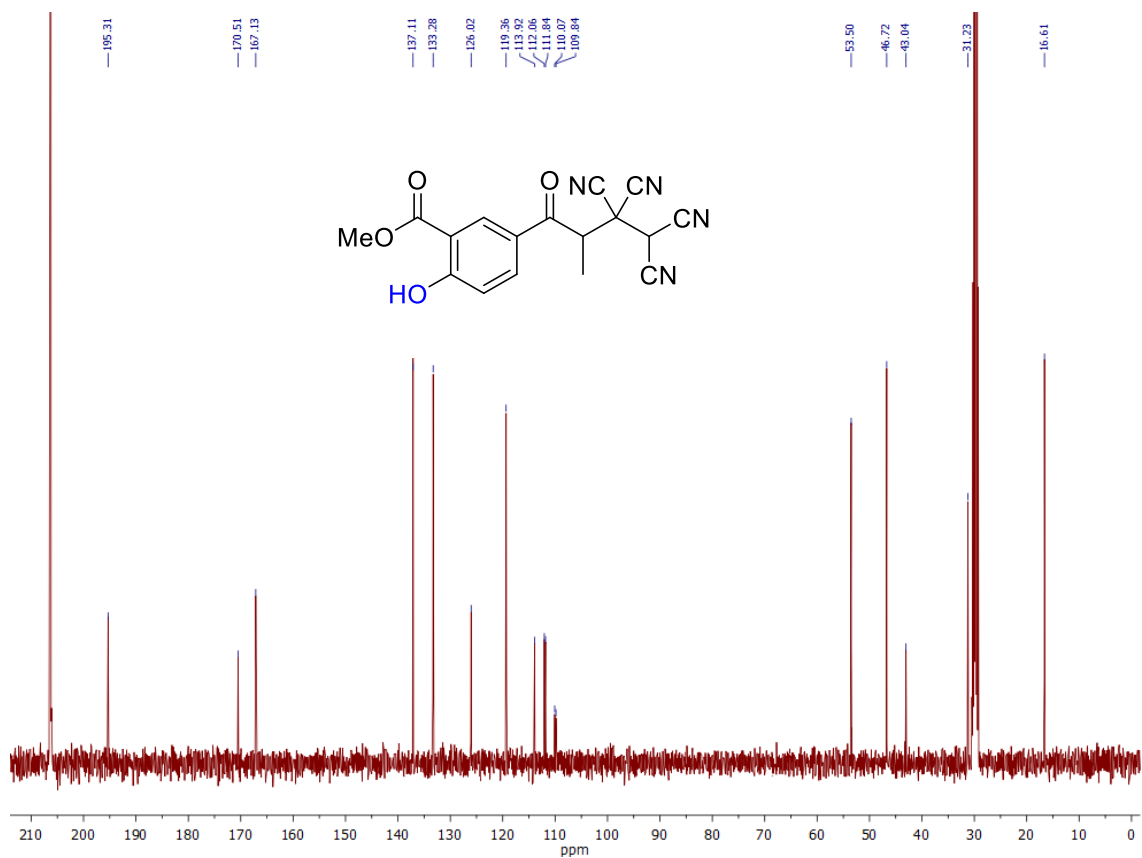

Fig. S8. <sup>13</sup>C-NMR-spectrum of compound **1d** (101 MHz, acetone-*d*<sub>6</sub>)

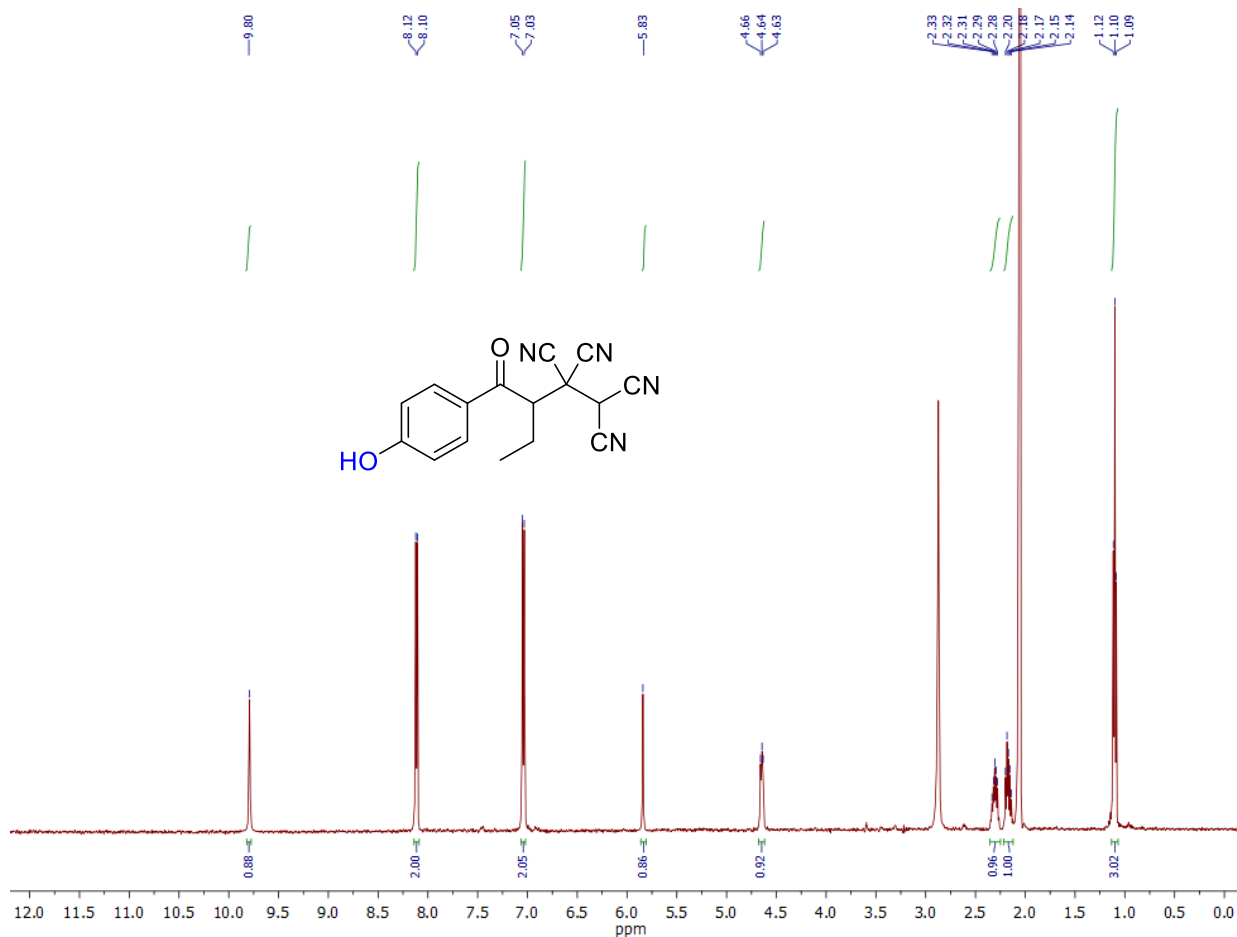

Fig. S9.  $^1\text{H}$ -NMR-spectrum of compound **1e** (500 MHz, acetone- $d_6$ )

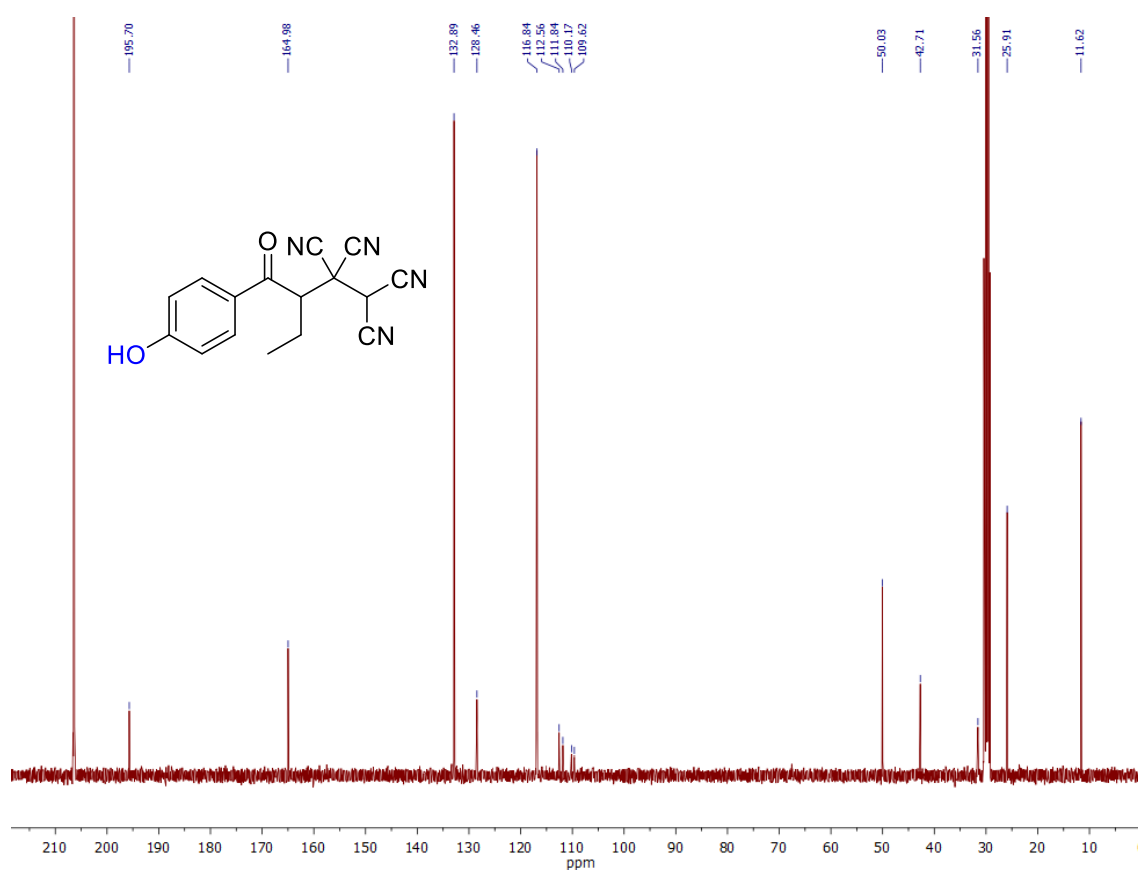

Fig. S10.  $^{13}\text{C}$ -NMR-spectrum of compound **1e** (101 MHz, acetone- $d_6$ )

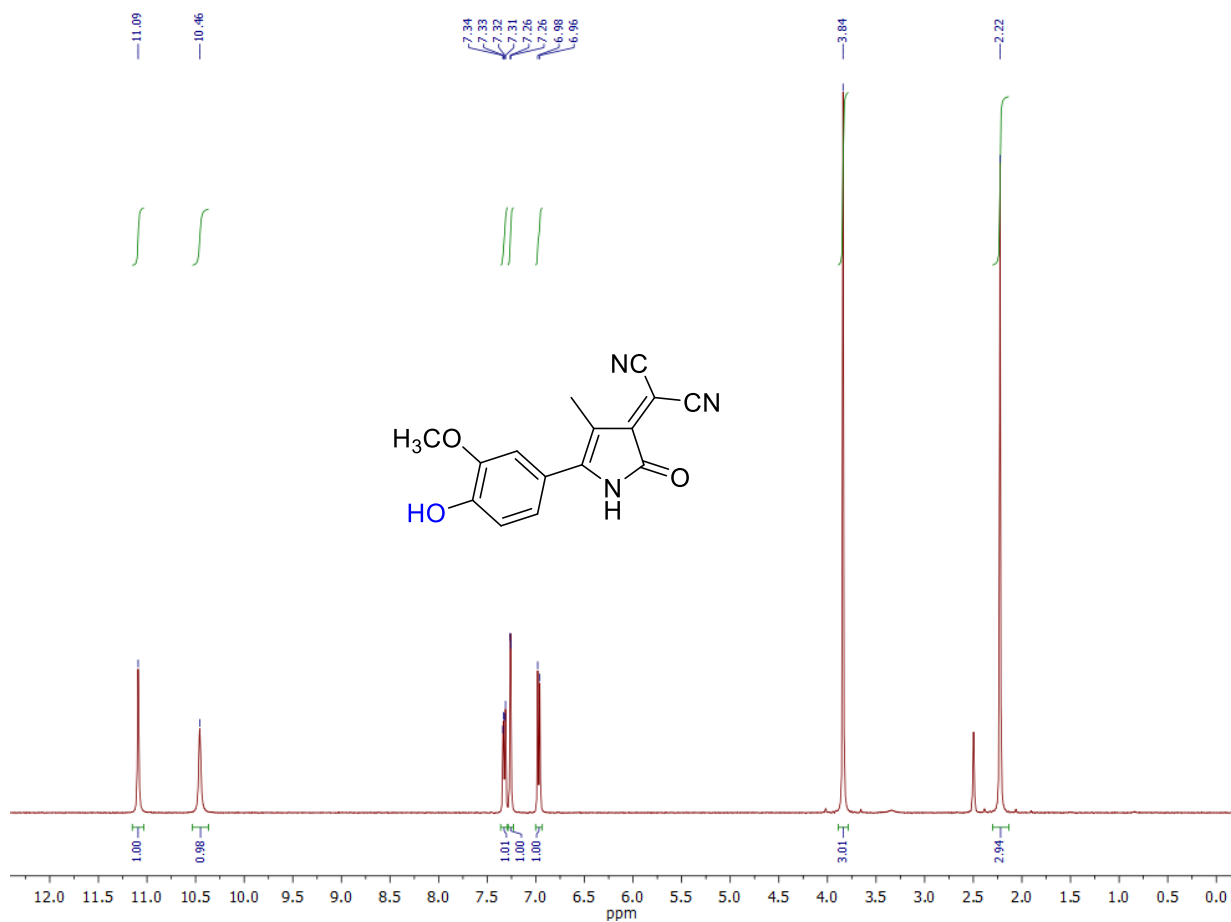

Fig. S11. <sup>1</sup>H-NMR-spectrum of compound **2b** (400 MHz, DMSO-*d*<sub>6</sub>)

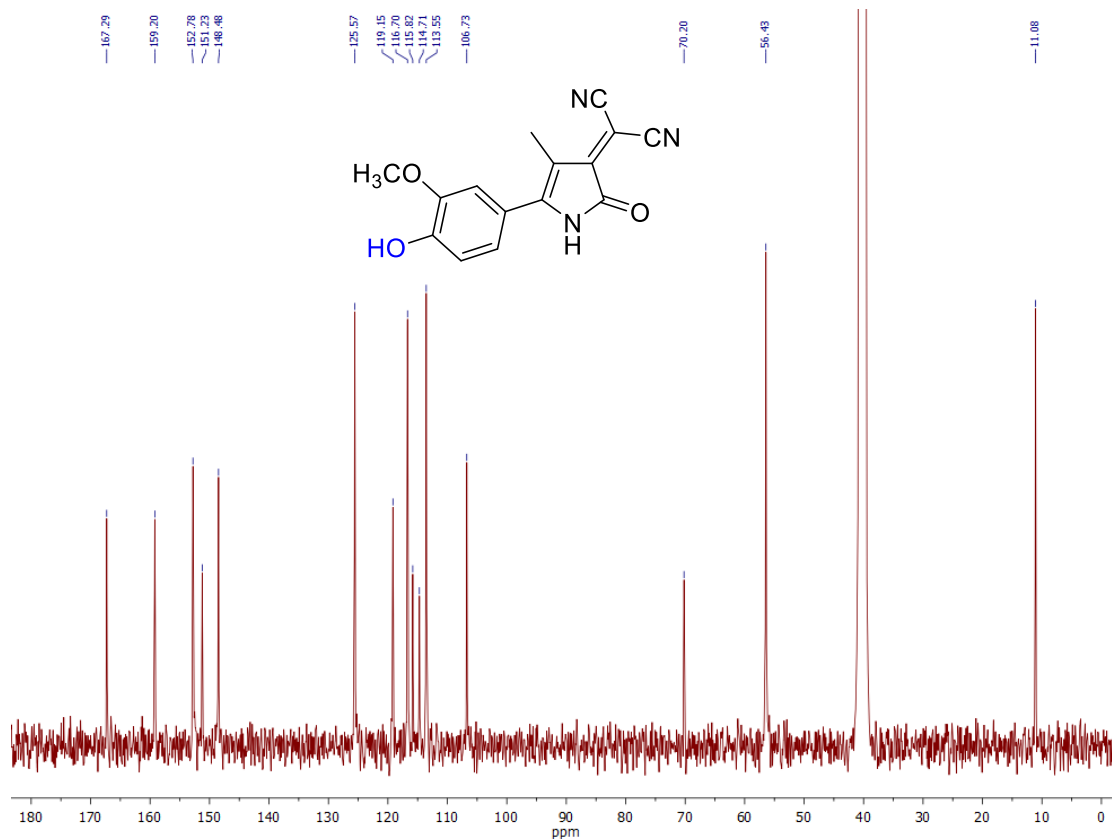

Fig. S12. <sup>13</sup>C-NMR-spectrum of compound **2b** (101 MHz, DMSO-*d*<sub>6</sub>)

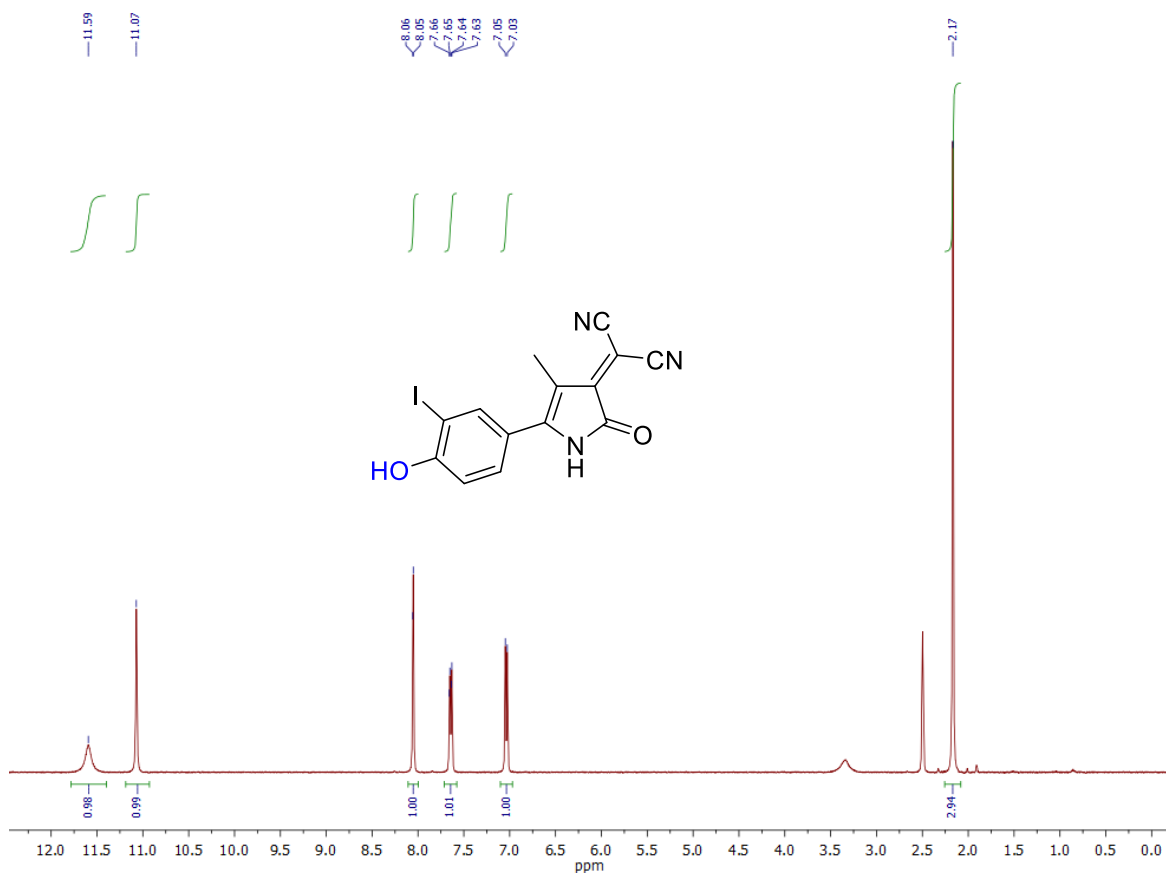

Fig. S13. <sup>1</sup>H-NMR-spectrum of compound **2c** (400 MHz, DMSO-*d*<sub>6</sub>)

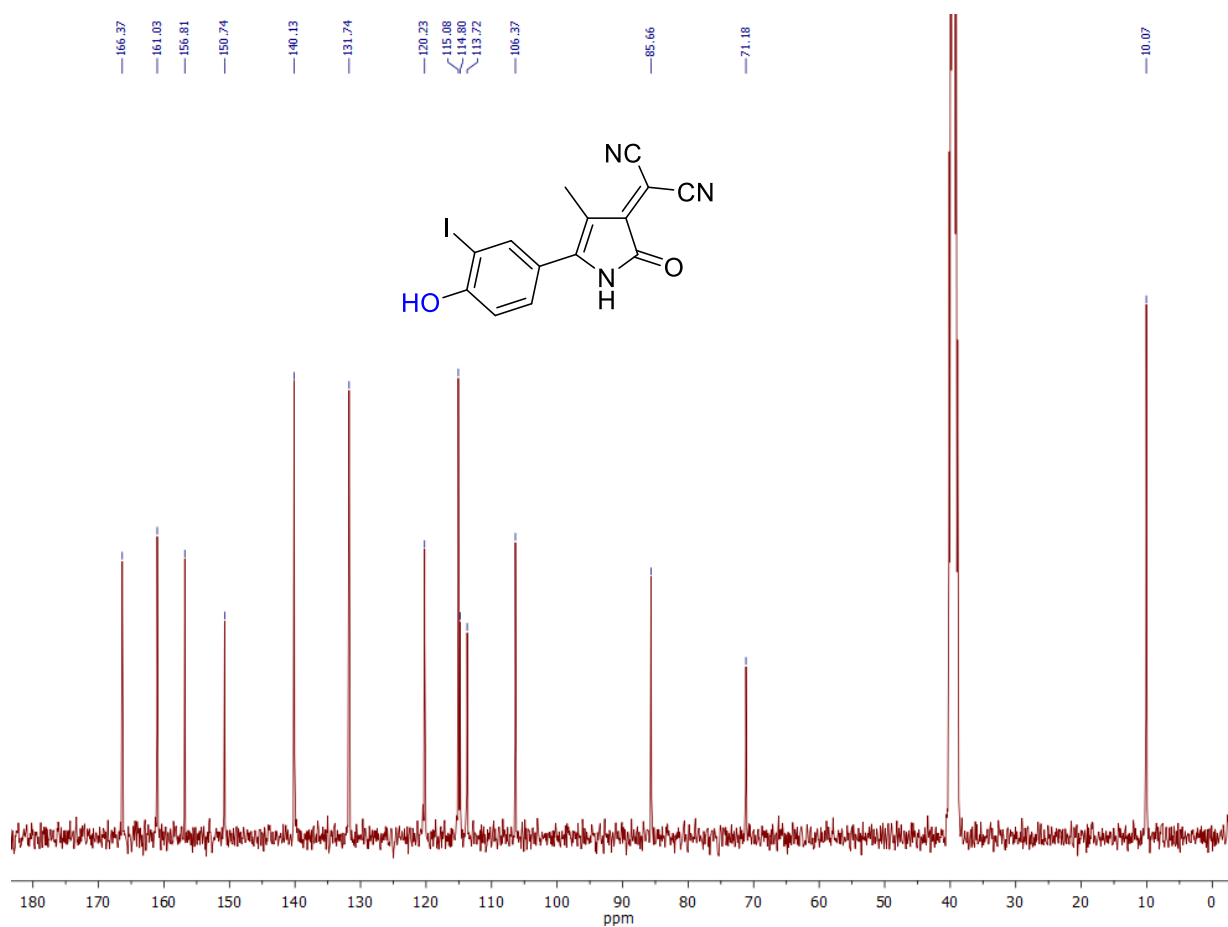

Fig. S14. <sup>13</sup>C-NMR-spectrum of compound **2c** (101 MHz, DMSO-*d*<sub>6</sub>)



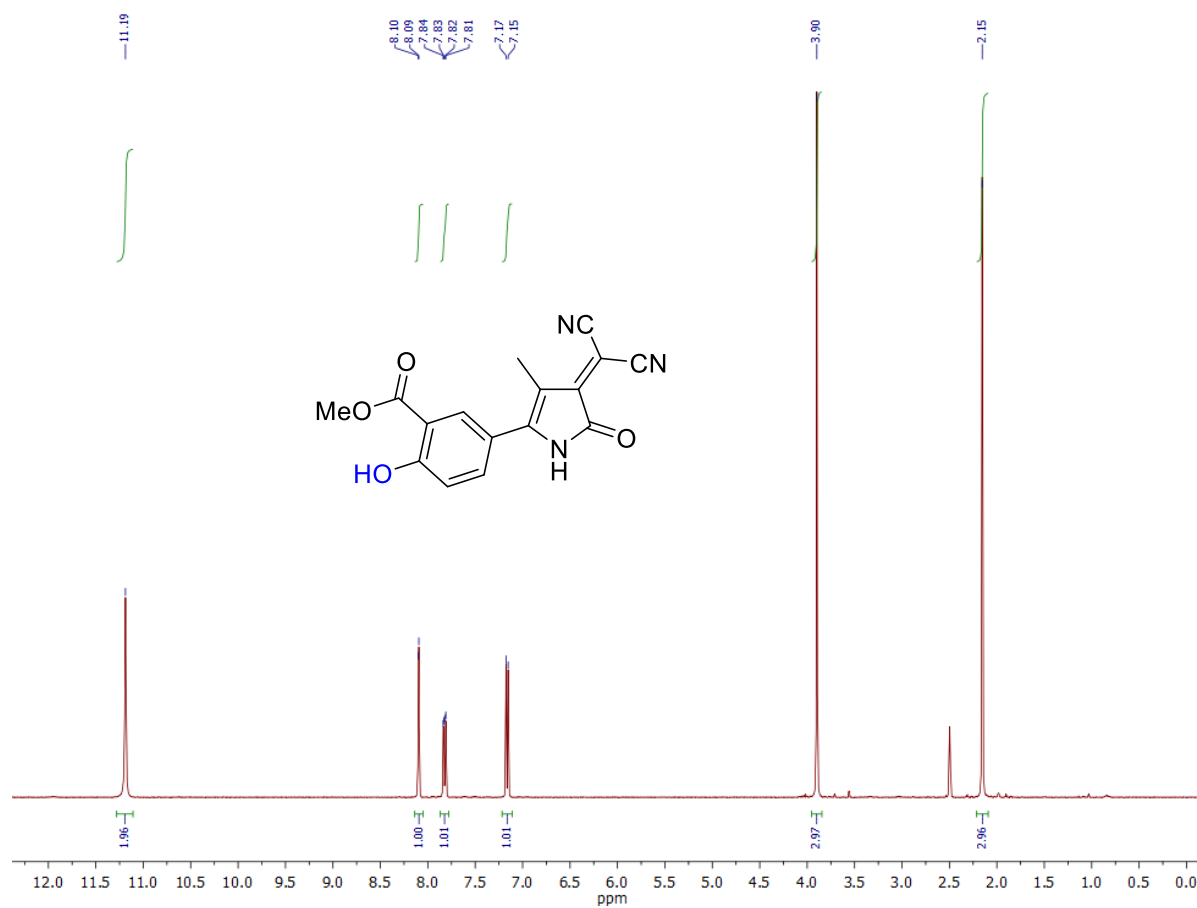

Fig. S15. <sup>1</sup>H-NMR-spectrum of compound **2d** (400 MHz, DMSO-*d*<sub>6</sub>)

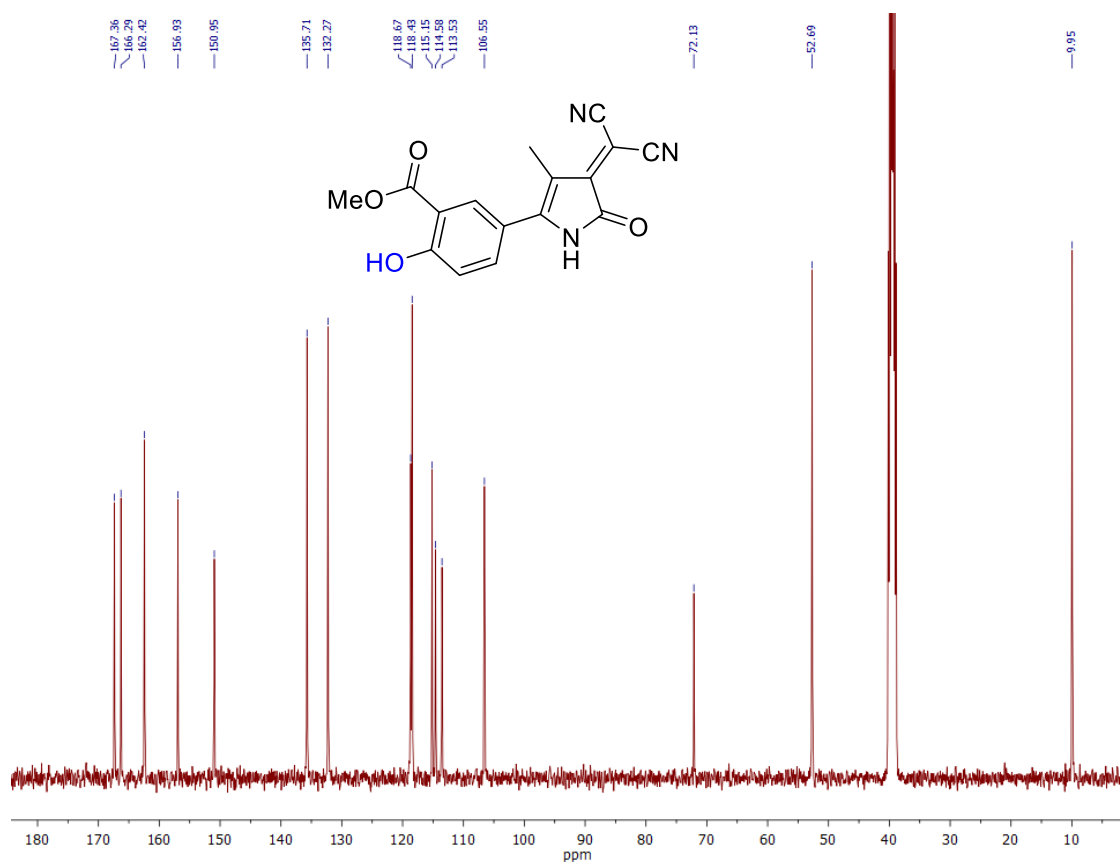

Fig. S16. <sup>13</sup>C-NMR-spectrum of compound **2d** (101 MHz, DMSO-*d*<sub>6</sub>)

## Kinetic study for the transformation of 2a-C5 into 2a-Q

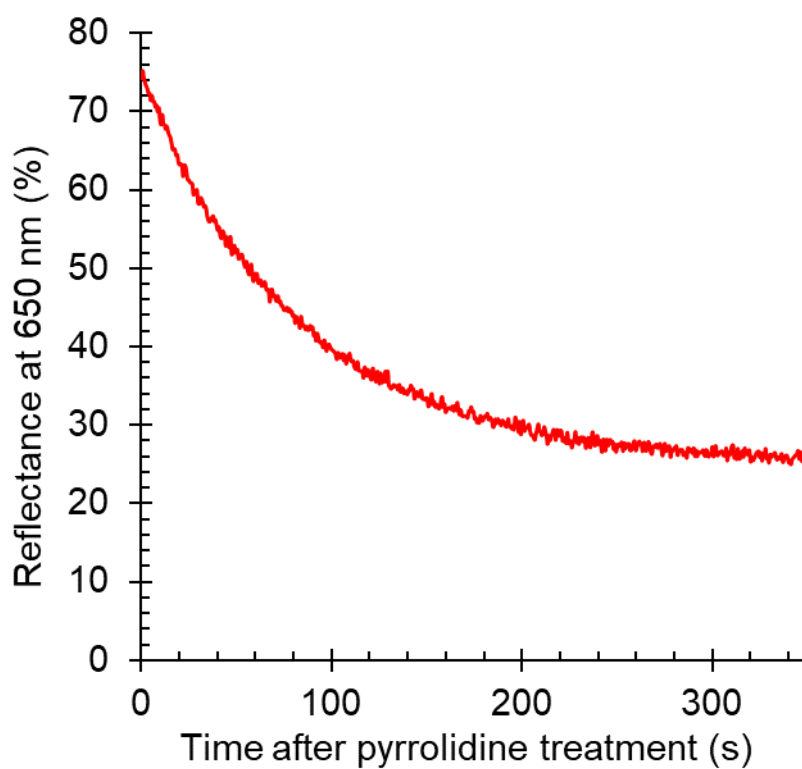

Fig. S17. Kinetic curve for the paper dyed with **2a** and treated with pyrrolidine vapors (25 °C)
